# Supplementary material for: Imaging of Al3+in plant roots by the interaction with a bisphenol A-based chemosensor
Source: Royal Society of Chemistry journal article supplement (doi:10.1039/d2nj06234h), 2023-01-01
Supplement: d2nj06234h1.pdf [file d2nj06234h1.pdf]

## **Imaging of Al<sup>3+</sup> in plants roots by the interaction with a bisphenol A based chemosensor**

**Sibshankar Bari<sup>a</sup>, Deepanjan Mridha<sup>b</sup>, Sneha Ghosh<sup>a</sup>, Pritam Ghosh<sup>c</sup>, Tarit Roychowdhury<sup>b</sup> and Partha Roy<sup>\*a</sup>**

<sup>a</sup> Department of Chemistry, Jadavpur University, Kolkata, 700032, India

Email address: partha.roy@jadavpuruniversity.in

<sup>b</sup> School of Environmental Studies, Jadavpur University, Kolkata, 700032, India

<sup>c</sup> Chemistry Division, School of Advanced Sciences, Vellore Institute of Technology, Chennai Campus, Chennai 600127, Tamilnadu, India

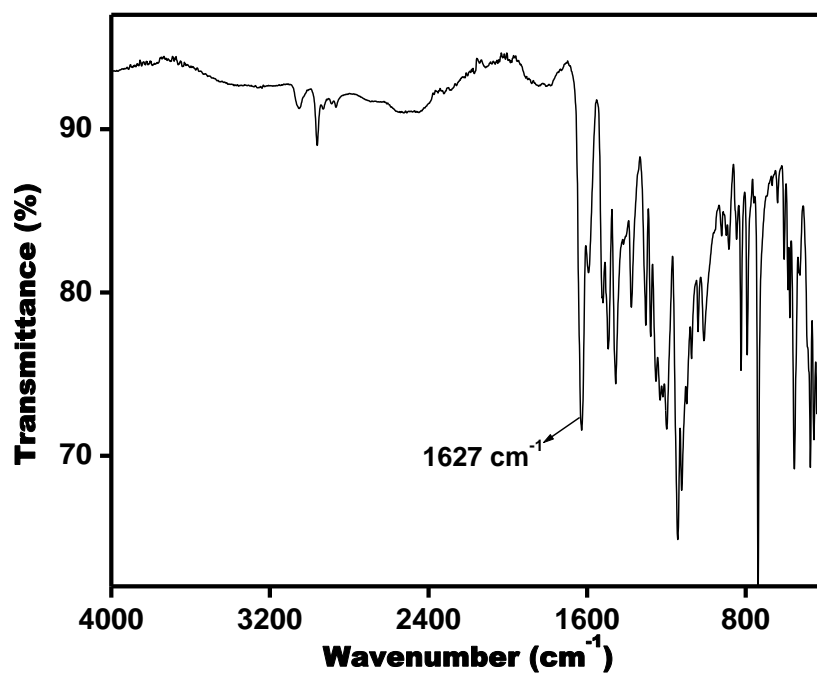

Fig. S1 FTIR spectrum of H<sub>4</sub>L

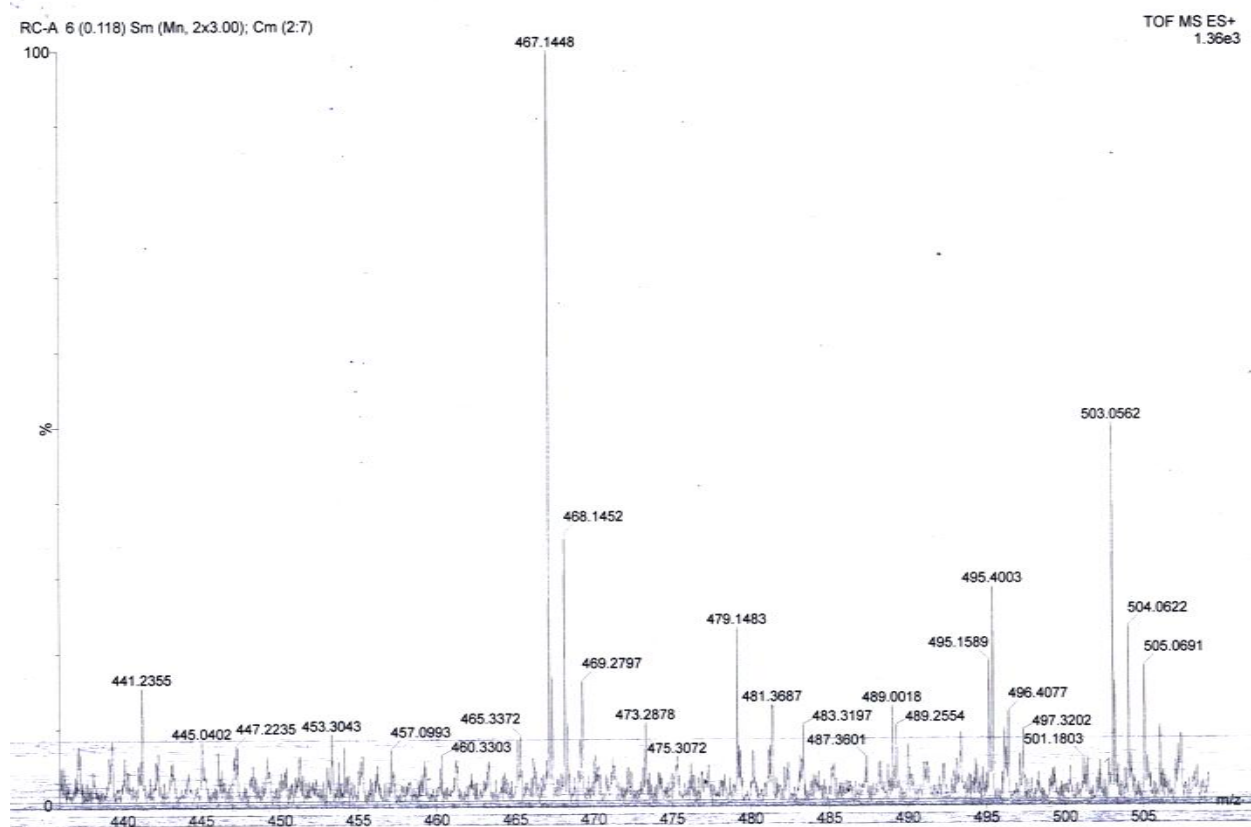

Fig. S2 ESI mass spectrum of H<sub>4</sub>L in methanol

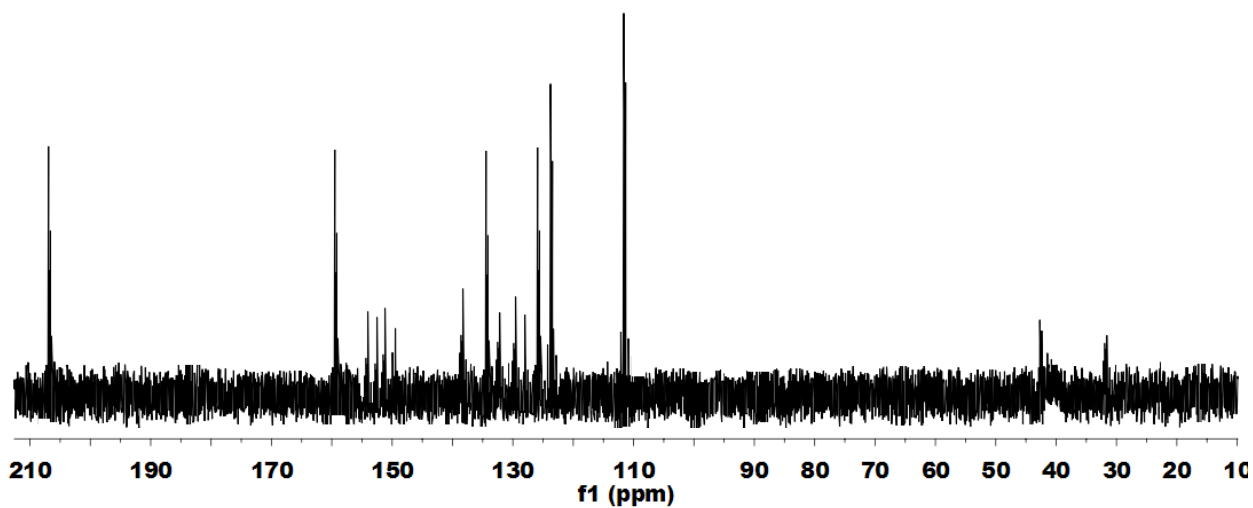

Fig. S3  $^{13}\text{C}$  NMR spectrum of  $\text{H}_4\text{L}$  in  $\text{DMSO-d}_6$ .

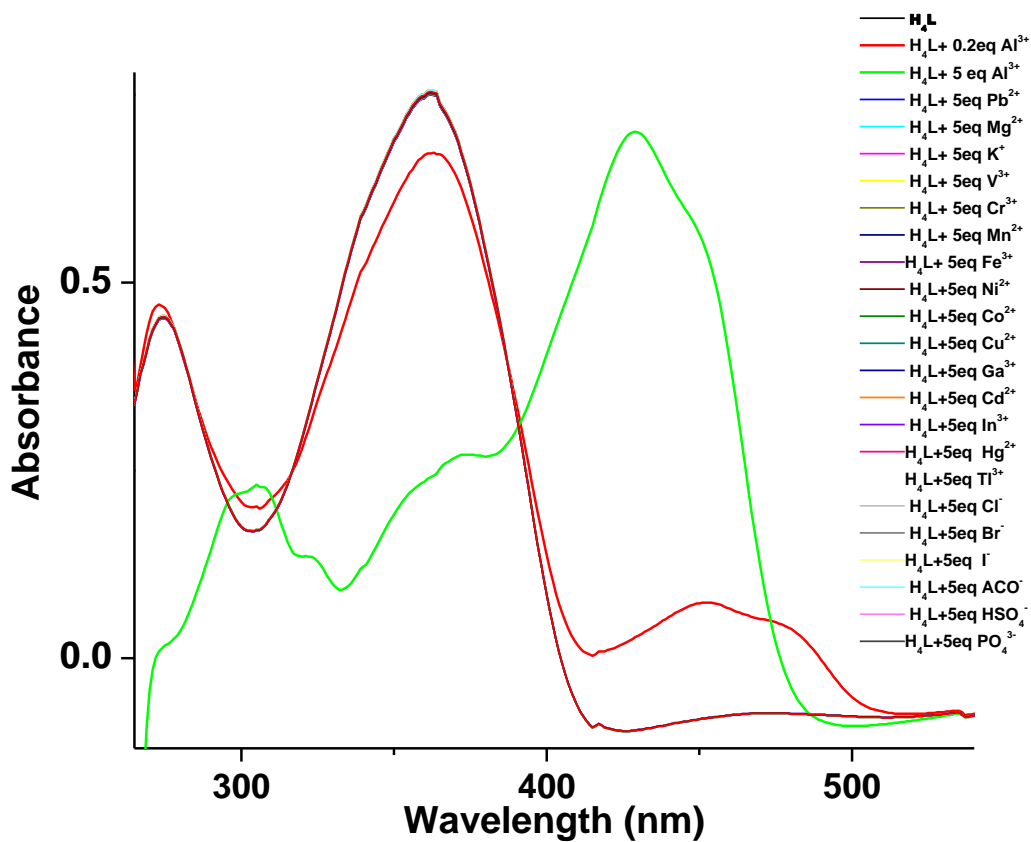

Fig. S4 Absorption spectra of  $\text{H}_4\text{L}$  ( $40\ \mu\text{M}$ ) in the presence of different metal ions in 10 mM HEPES buffer in  $\text{H}_2\text{O}/\text{DMF} = 4:1$  (v/v) (pH 7.4)

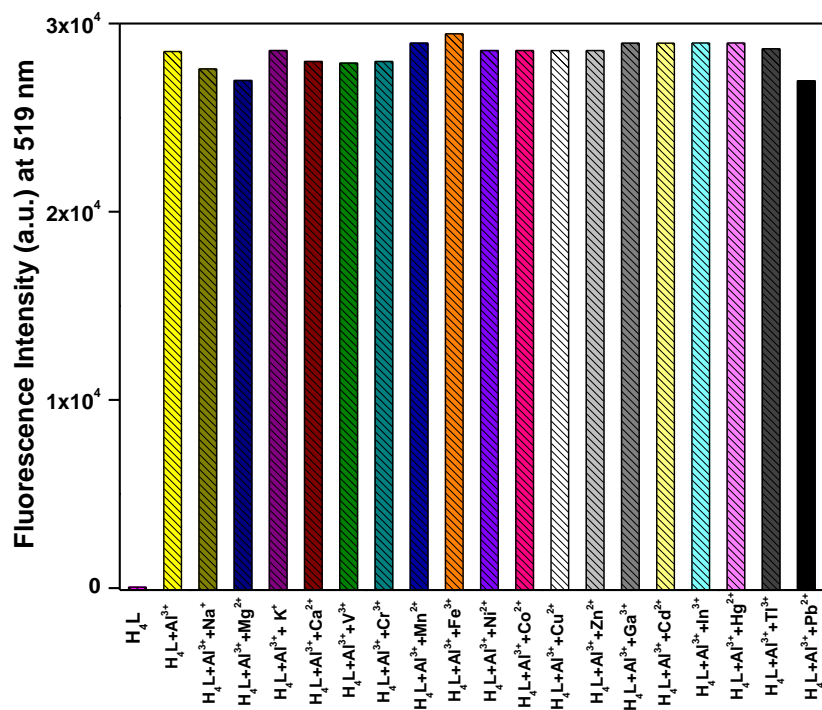

**Fig. S5** Fluorescence intensity of **H<sub>4</sub>L+Al<sup>3+</sup>** in the presence of different metal ions in 10 mM HEPES buffer in H<sub>2</sub>O/DMF = 4:1 (v/v) (pH 7.4)

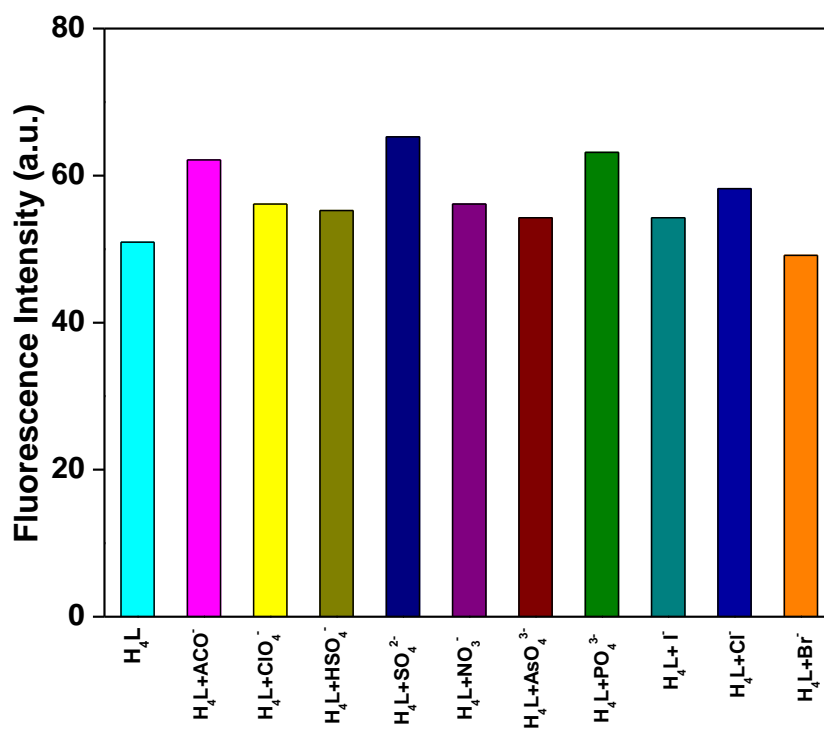

**Fig. S6** Fluorescence intensity of **H<sub>4</sub>L** (40 μM) in the presence of different anions in 10 mM HEPES buffer in H<sub>2</sub>O/DMF = 4:1 (v/v) (pH 7.4)

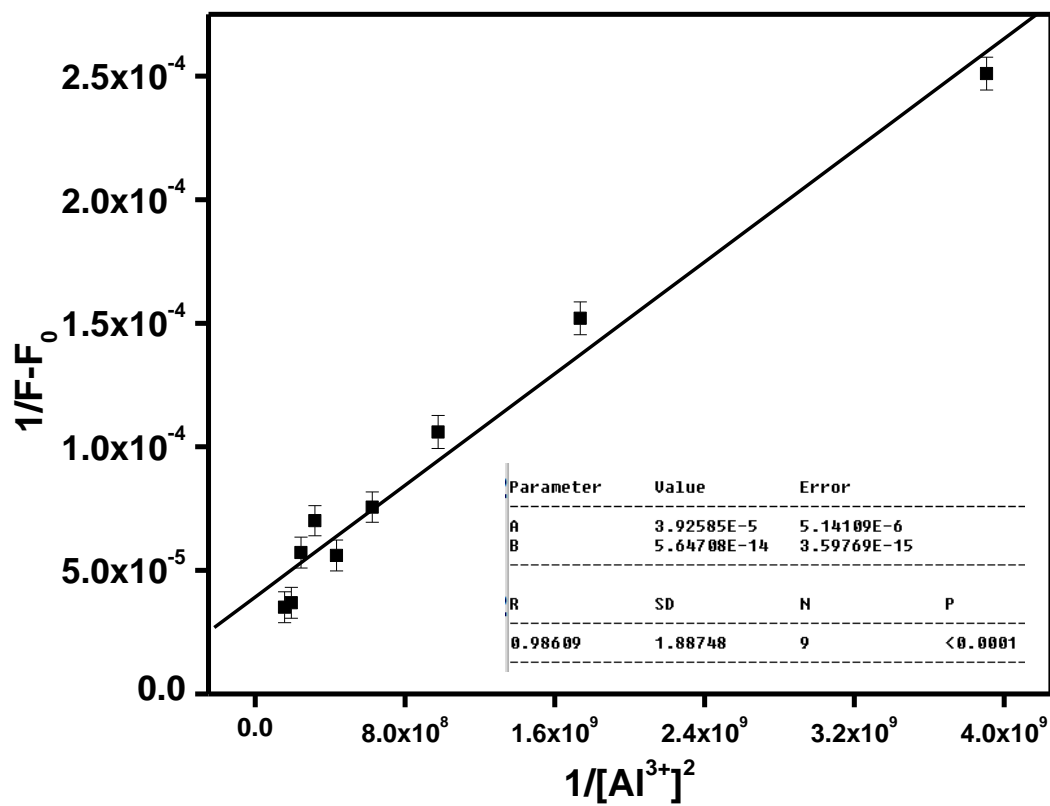

Fig. S7 A plot of  $1/(F-F_0)$  vs.  $1/[Al^{3+}]^2$  for the determination of association constant.

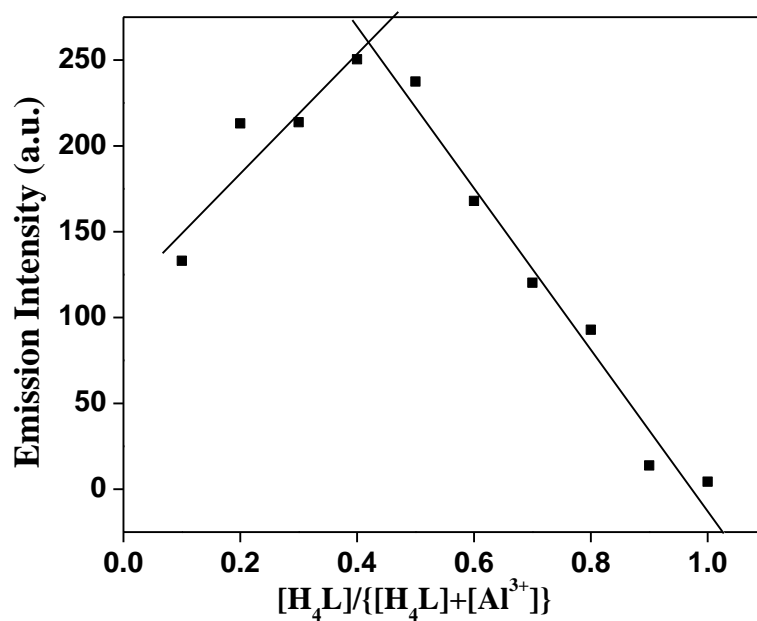

Fig. S8 Job's plot analysis indicating 1:2 (L/M) stoichiometry.

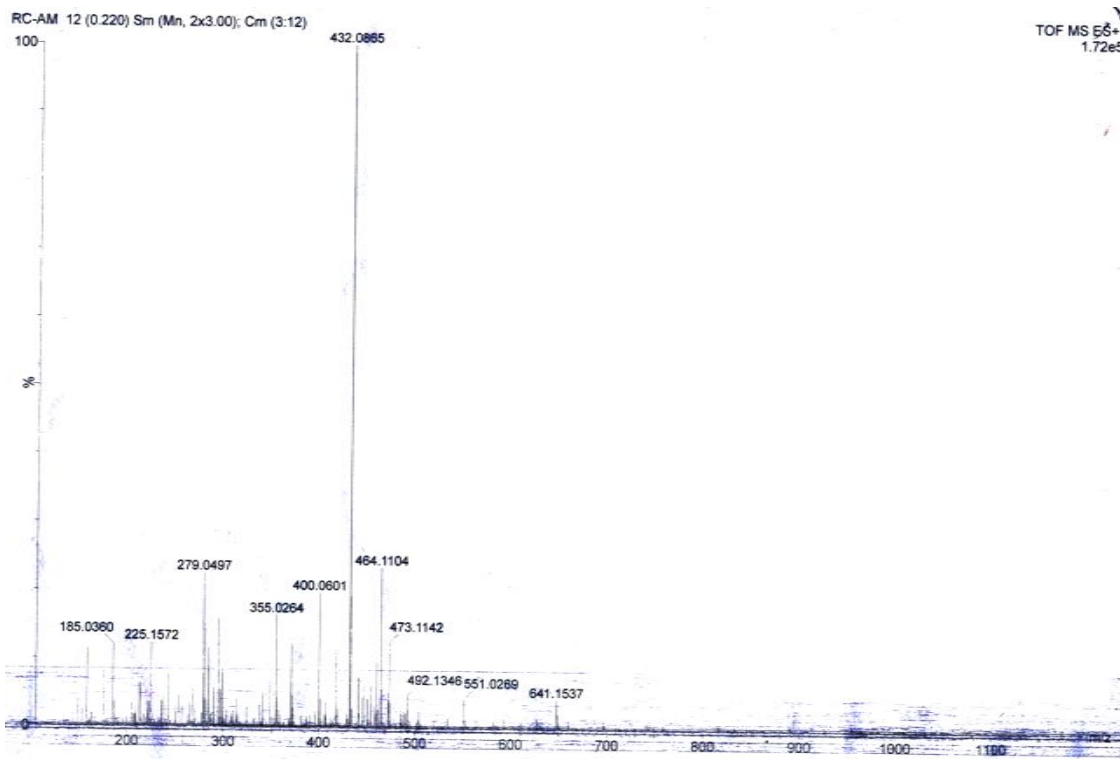

**Fig. S9** ESI mass spectrum of **H<sub>4</sub>L** with  $\text{Al}(\text{NO}_3)_3$  in methanol

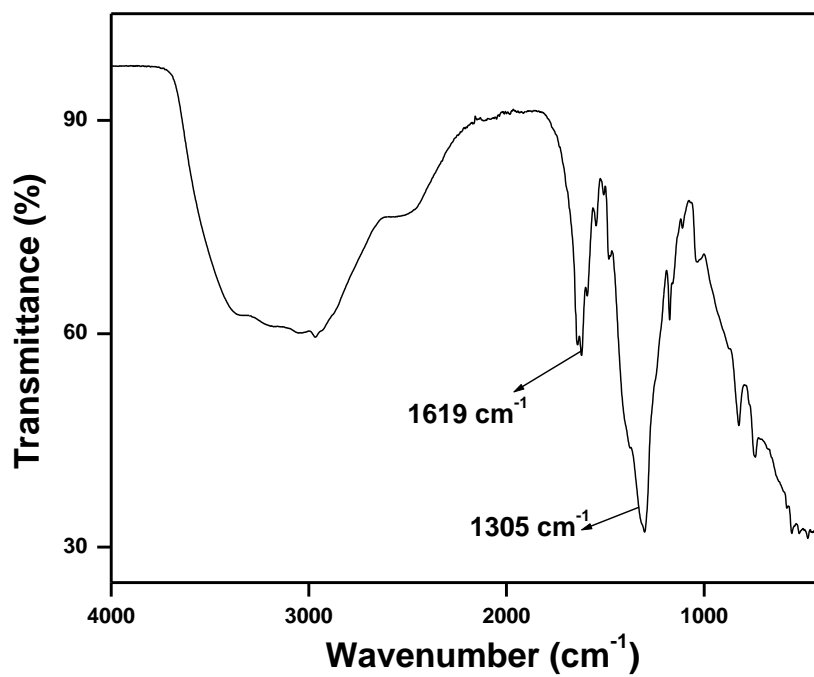

**Fig. S10** FTIR spectrum of complex of **H<sub>4</sub>L** with  $\text{Al}^{3+}$ .

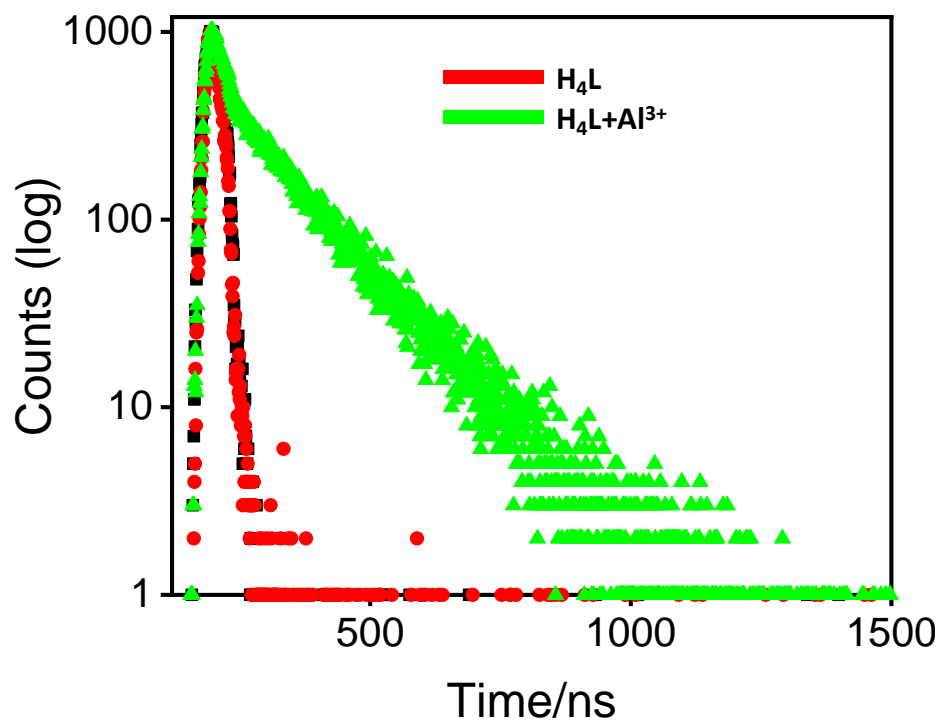

**Fig. S11** Fluorescence excited state decay behavior of **H<sub>4</sub>L** and its complex with Al<sup>3+</sup>

Limit of detection (LOD) for H<sub>4</sub>L has been determined by 3σ method by the following equation:

$$DL = K \cdot Sb1/S$$

where K = 2 or 3 (3 in this case); here Sb1 is the standard deviation of the blank H<sub>4</sub>L solution; and S is the slope of the calibration curve obtained from Linear dynamic plot of F.I. vs [M<sup>n+</sup>] in M. The LOD of H<sub>4</sub>L has been calculated to be 4.6×10<sup>-7</sup> M for Al<sup>3+</sup>.

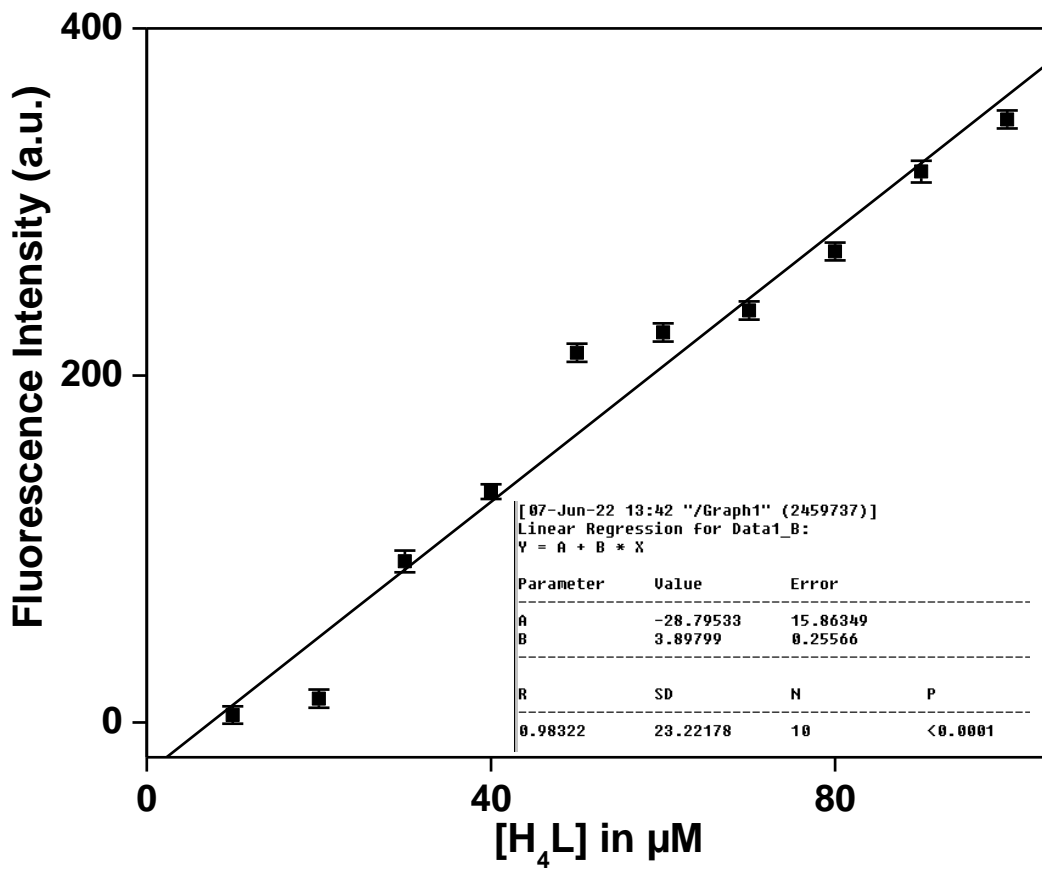

Fig. S12 Determination of Sb1 of the blank, H<sub>4</sub>L solution.



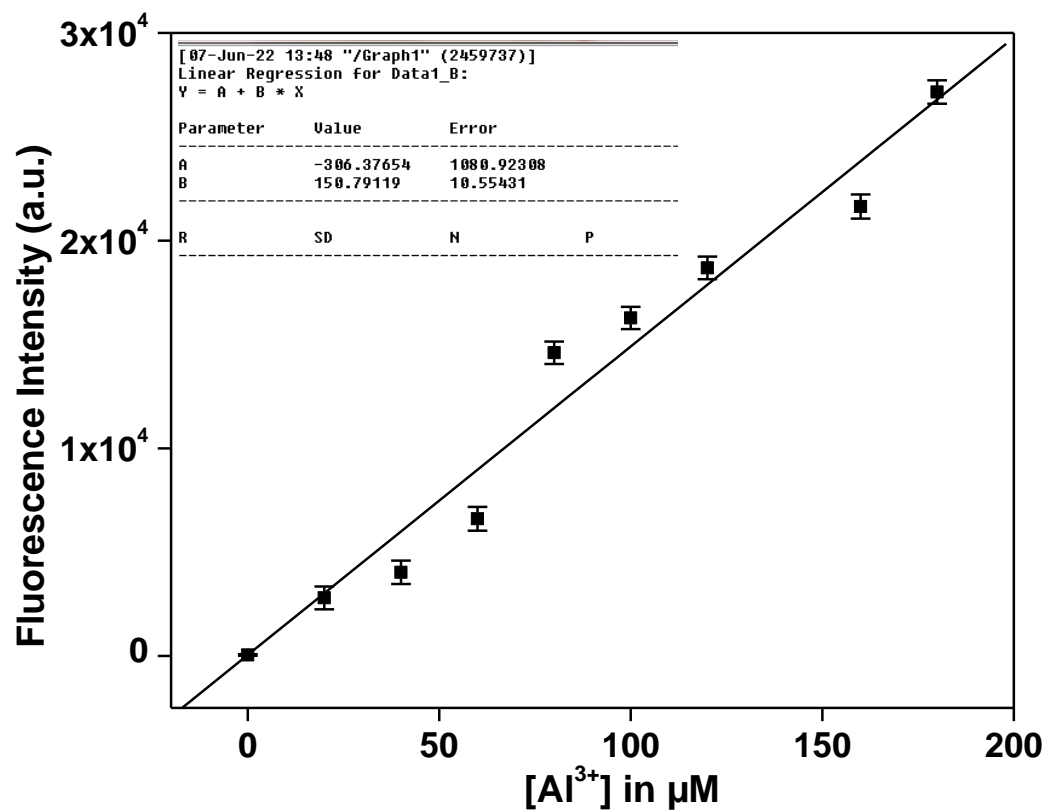

**Fig. S13** Linear dynamic plot of F.I. vs. [Al<sup>3+</sup>] for the determination of S (slope); [H<sub>4</sub>L] = 40 μM

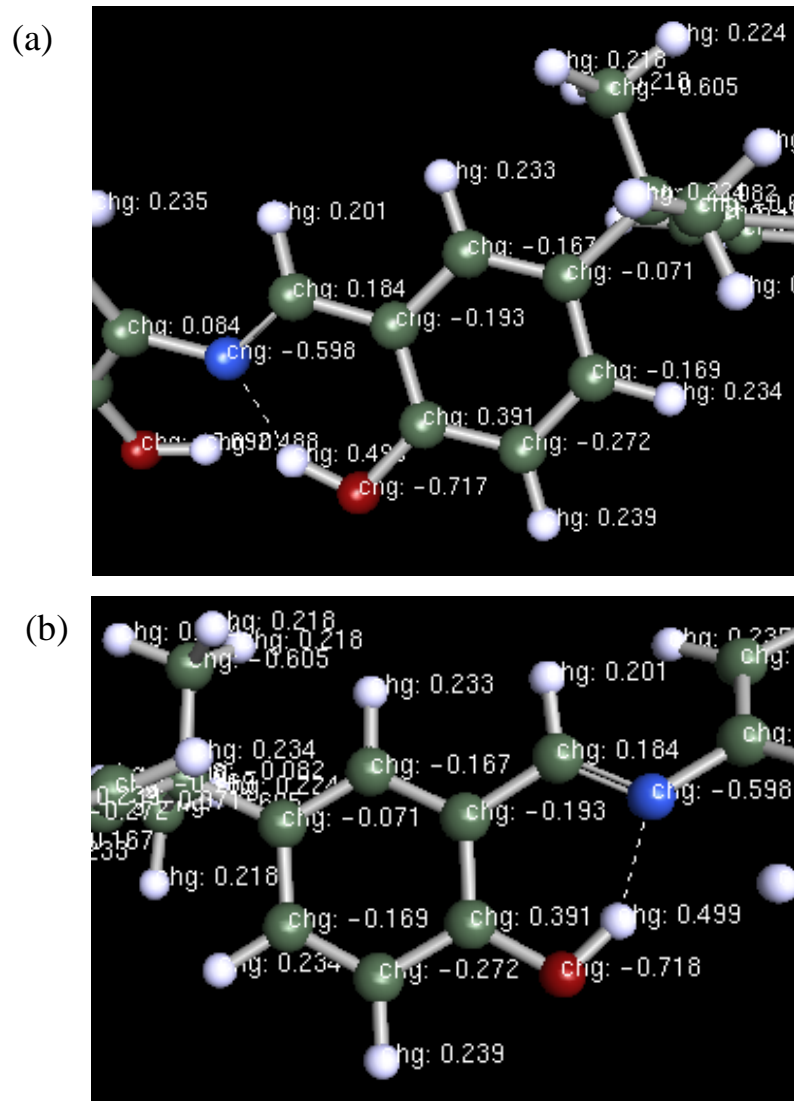

**Fig. S14** NBO population of **H<sub>4</sub>L**, pictorial diagram, blue: Nitroegn, Green: Carbon, White: Hydrogen, red: oxygen.

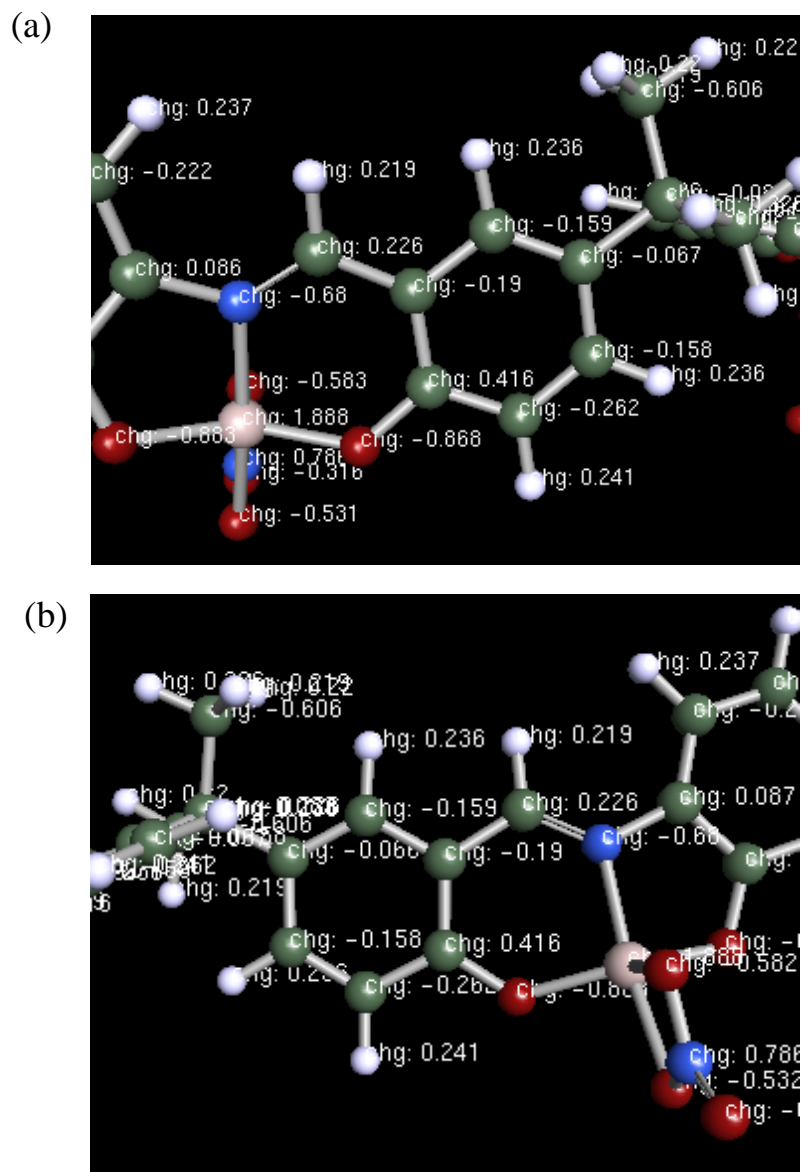

**Fig. S15** NBO population of  $\text{Al}^{3+}\text{-H}_4\text{L}$ , pictorial diagram, blue: Nitroegn, Green: Carbon, White: Hydrogen, red: oxygen.

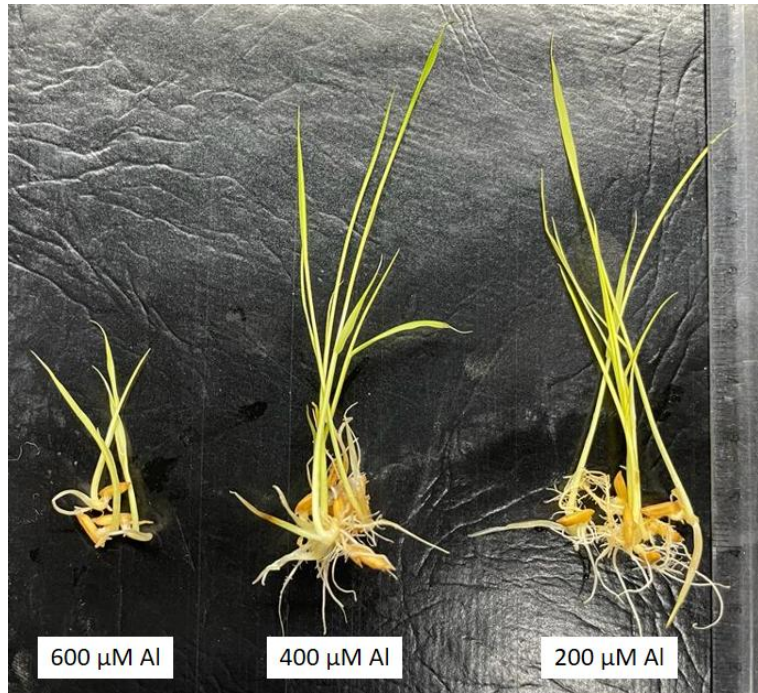

**Fig. S16** Rice seedlings growth after 14 DAS under different Al treatment.

Table S1. Geometry optimized coordinates of **H<sub>4</sub>L**.

total energy = -1529.24727693084 Hartree

61

|   |            |           |            |
|---|------------|-----------|------------|
| O | 8.3546748  | 3.2912002 | 0.4760588  |
| C | 4.0707569  | 7.0909769 | 0.3792825  |
| C | 4.4597374  | 8.5058561 | 0.8596100  |
| C | 3.6324215  | 7.1961151 | -1.0974300 |
| C | 5.2504053  | 6.1087959 | 0.4526969  |
| C | 5.0199954  | 4.7334573 | 0.2206075  |
| C | 6.0477754  | 3.7973880 | 0.2276792  |
| C | 7.3699503  | 4.2016400 | 0.4778518  |
| C | 7.6312401  | 5.5778416 | 0.7226634  |
| C | 6.5610337  | 6.5020052 | 0.7024056  |
| C | 8.9775319  | 6.0423560 | 0.9857700  |
| C | 2.9397829  | 6.5785077 | 1.2846622  |
| C | 3.2235426  | 6.2621851 | 2.6329982  |
| C | 2.2404001  | 5.8329879 | 3.5172025  |
| C | 0.9116191  | 5.6927096 | 3.0825590  |
| C | 0.5974586  | 5.9963423 | 1.7293272  |
| C | 1.6229575  | 6.4355344 | 0.8602587  |
| C | -0.7572291 | 5.8650711 | 1.2343308  |
| H | 9.2124939  | 3.7946161 | 0.6432035  |
| H | 3.5727765  | 9.1595404 | 0.8299550  |
| H | 5.2303191  | 8.9524867 | 0.2095849  |
| H | 4.8412643  | 8.4977373 | 1.8934251  |

|   |            |           |            |
|---|------------|-----------|------------|
| H | 3.2846709  | 6.2277148 | -1.4919969 |
| H | 4.4870202  | 7.5254606 | -1.7106477 |
| H | 2.8219347  | 7.9329886 | -1.2237951 |
| H | 3.9998325  | 4.3885488 | 0.0344623  |
| H | 5.8488499  | 2.7396118 | 0.0438464  |
| H | 6.8031765  | 7.5485824 | 0.8914005  |
| H | 9.1106394  | 7.1265452 | 1.1328388  |
| H | 4.2505854  | 6.3507865 | 2.9958558  |
| H | 2.4801100  | 5.5952717 | 4.5556032  |
| H | 1.3408038  | 6.6610967 | -0.1688988 |
| H | -0.9337774 | 6.1500307 | 0.1843659  |
| O | 11.7175989 | 3.5702902 | 2.3315511  |
| N | 9.9842008  | 5.2307783 | 1.0524829  |
| C | 12.1772365 | 4.7604893 | 1.8765618  |
| C | 11.3026240 | 5.6698436 | 1.2316219  |
| C | 11.8079483 | 6.9013873 | 0.7796411  |
| C | 13.1513312 | 7.2315314 | 0.9709188  |
| C | 14.0061879 | 6.3258719 | 1.6150903  |
| C | 13.5228704 | 5.0944126 | 2.0659150  |
| H | 11.1469394 | 7.5885363 | 0.2472030  |
| H | 13.5342164 | 8.1869709 | 0.6048367  |
| H | 15.0594956 | 6.5770499 | 1.7634967  |
| H | 14.1750261 | 4.3786231 | 2.5709452  |
| H | 10.7531325 | 3.5381549 | 2.1768619  |
| O | -0.0299345 | 5.2834174 | 3.9453487  |
| H | -0.9025322 | 5.2813635 | 3.4396160  |

|   |            |           |            |
|---|------------|-----------|------------|
| O | -3.3242328 | 3.5052633 | 3.0426321  |
| N | -1.7222963 | 5.4290560 | 1.9793201  |
| C | -3.8560852 | 4.3660384 | 2.1420236  |
| C | -3.0510013 | 5.3643318 | 1.5394928  |
| C | -3.6300182 | 6.2354627 | 0.6002280  |
| C | -4.9780503 | 6.1149954 | 0.2559116  |
| C | -5.7637762 | 5.1203671 | 0.8553288  |
| C | -5.2067417 | 4.2490169 | 1.7954314  |
| H | -3.0234297 | 7.0312684 | 0.1627955  |
| H | -5.4185643 | 6.8050252 | -0.4674797 |
| H | -6.8206225 | 5.0247921 | 0.5935727  |
| H | -5.8043969 | 3.4677776 | 2.2699736  |
| H | -2.3663924 | 3.6880142 | 3.1082389  |

Table S2. Geometry optimized coordinates of  $\text{Al}^{3+}\text{-H}_4\text{L}$ .

total energy = -2572.13387985363 Hartree

67

|   |           |           |            |
|---|-----------|-----------|------------|
| O | 8.4583454 | 3.3134293 | -0.0264057 |
| C | 4.1207071 | 7.0145326 | 0.5041020  |
| C | 4.4477861 | 8.2853659 | 1.3174807  |
| C | 3.7451361 | 7.4495498 | -0.9288113 |
| C | 5.3194265 | 6.0591138 | 0.4113073  |
| C | 5.1382588 | 4.7763409 | -0.1584868 |
| C | 6.1849725 | 3.8780429 | -0.3075778 |
| C | 7.4841270 | 4.2051262 | 0.1263414  |

|   |            |           |            |
|---|------------|-----------|------------|
| C | 7.6922857  | 5.4954220 | 0.7023090  |
| C | 6.6001217  | 6.3931649 | 0.8240235  |
| C | 8.9984330  | 5.9632798 | 1.0700863  |
| C | 2.9702094  | 6.2814119 | 1.2090042  |
| C | 3.2013151  | 5.6854096 | 2.4717367  |
| C | 2.1991140  | 5.0367009 | 3.1785788  |
| C | 0.8985331  | 4.9262804 | 2.6498447  |
| C | 0.6401351  | 5.5231238 | 1.3782013  |
| C | 1.6865700  | 6.1930057 | 0.6928471  |
| C | -0.6765312 | 5.5600415 | 0.8078721  |
| O | 11.7697841 | 3.4511459 | 0.3420083  |
| N | 10.0546083 | 5.2000570 | 1.0670638  |
| C | 12.2927458 | 4.6206435 | 0.7522963  |
| C | 11.3900854 | 5.6270775 | 1.1906430  |
| C | 11.8545734 | 6.8666822 | 1.6415128  |
| C | 13.2298558 | 7.1132231 | 1.6552385  |
| C | 14.1262504 | 6.1261318 | 1.2148833  |
| C | 13.6679182 | 4.8841869 | 0.7632107  |
| O | -0.0312477 | 4.2871771 | 3.3534418  |
| O | -3.3276550 | 3.9304565 | 3.0094495  |
| N | -1.6884695 | 4.9129372 | 1.3130882  |
| C | -3.9002412 | 4.5221350 | 1.9456500  |
| C | -3.0405488 | 5.0691423 | 0.9547423  |
| C | -3.5578280 | 5.6923442 | -0.1852893 |
| C | -4.9434164 | 5.7769642 | -0.3443406 |
| C | -5.7979427 | 5.2460135 | 0.6352951  |



|   |            |           |            |
|---|------------|-----------|------------|
| C | -5.2867769 | 4.6215433 | 1.7777513  |
| H | 3.5461908  | 8.9149372 | 1.3936402  |
| H | 5.2349439  | 8.8825038 | 0.8279254  |
| H | 4.7816649  | 8.0466764 | 2.3402461  |
| H | 3.4482770  | 6.5933183 | -1.5558907 |
| H | 4.6134644  | 7.9332653 | -1.4052717 |
| H | 2.9161992  | 8.1767425 | -0.9220362 |
| H | 4.1413706  | 4.4750578 | -0.4898012 |
| H | 6.0219515  | 2.8945567 | -0.7526930 |
| H | 6.8085242  | 7.3715974 | 1.2577436  |
| H | 9.1033542  | 7.0294656 | 1.3073326  |
| H | 4.2023185  | 5.7294055 | 2.9081100  |
| H | 2.3996744  | 4.5866134 | 4.1528246  |
| H | 1.4398141  | 6.6447129 | -0.2683797 |
| H | -0.8316324 | 6.2121646 | -0.0608810 |
| H | 11.1551811 | 7.6311875 | 1.9863632  |
| H | 13.6050941 | 8.0751504 | 2.0117648  |
| H | 15.2007004 | 6.3274118 | 1.2272194  |
| H | 14.3608072 | 4.1124694 | 0.4214332  |
| H | -2.8904413 | 6.1014610 | -0.9467125 |
| H | -5.3591956 | 6.2552155 | -1.2340645 |
| H | -6.8809131 | 5.3173970 | 0.5042376  |
| H | -5.9468019 | 4.2056820 | 2.5418836  |
| N | -1.3469471 | 1.3551145 | 3.0263731  |
| O | -1.5338607 | 2.1255010 | 4.0286462  |
| O | -1.3069932 | 2.0242112 | 1.9132327  |

|    |            |           |           |
|----|------------|-----------|-----------|
| O  | -1.2218460 | 0.1732990 | 3.0890990 |
| N  | 9.9692237  | 1.3615653 | 2.0558982 |
| O  | 10.1152113 | 1.3164055 | 0.7871154 |
| O  | 9.8709529  | 2.5855543 | 2.4799830 |
| O  | 9.9262749  | 0.4113608 | 2.7712942 |
| Al | -1.5850645 | 3.6936436 | 2.8082503 |
| Al | 10.0450916 | 3.3007715 | 0.7115550 |

Table S3. Vibrational dataset for **H<sub>4</sub>L**.

Vibrational Spectrum:

| mode | symmetry | wave number<br>cm <sup>**</sup> (-1) | IR intensity<br>km/mol | IR  | selection rules<br>Raman |
|------|----------|--------------------------------------|------------------------|-----|--------------------------|
| 1    | a        | -2.27                                | 0.00000                | YES | YES                      |
| 2    |          | -0.00                                | 0.00000                | -   | -                        |
| 3    |          | -0.00                                | 0.00000                | -   | -                        |
| 4    |          | -0.00                                | 0.00000                | -   | -                        |
| 5    |          | 0.00                                 | 0.00000                | -   | -                        |
| 6    |          | 0.00                                 | 0.00000                | -   | -                        |
| 7    |          | 0.00                                 | 0.00000                | -   | -                        |
| 8    | a        | 5.89                                 | 0.00496                | YES | YES                      |
| 9    | a        | 13.78                                | 0.30397                | YES | YES                      |
| 10   | a        | 26.14                                | 0.67529                | YES | YES                      |
| 11   | a        | 38.39                                | 0.33086                | YES | YES                      |
| 12   | a        | 50.02                                | 0.91183                | YES | YES                      |
| 13   | a        | 56.21                                | 0.25724                | YES | YES                      |

|    |   |        |          |     |     |
|----|---|--------|----------|-----|-----|
| 14 | a | 57.42  | 0.39258  | YES | YES |
| 15 | a | 60.12  | 0.58277  | YES | YES |
| 16 | a | 104.50 | 1.01283  | YES | YES |
| 17 | a | 126.15 | 0.93610  | YES | YES |
| 18 | a | 134.96 | 0.16251  | YES | YES |
| 19 | a | 141.60 | 0.32016  | YES | YES |
| 20 | a | 155.66 | 1.08546  | YES | YES |
| 21 | a | 160.37 | 2.15763  | YES | YES |
| 22 | a | 201.14 | 3.37566  | YES | YES |
| 23 | a | 201.26 | 6.47451  | YES | YES |
| 24 | a | 217.53 | 1.28188  | YES | YES |
| 25 | a | 225.07 | 0.44243  | YES | YES |
| 26 | a | 242.94 | 6.46297  | YES | YES |
| 27 | a | 244.08 | 1.85806  | YES | YES |
| 28 | a | 276.78 | 24.60093 | YES | YES |
| 29 | a | 299.95 | 2.77172  | YES | YES |
| 30 | a | 307.79 | 4.63155  | YES | YES |
| 31 | a | 310.35 | 0.96716  | YES | YES |
| 32 | a | 319.06 | 14.12246 | YES | YES |
| 33 | a | 327.78 | 0.71022  | YES | YES |
| 34 | a | 340.18 | 0.05899  | YES | YES |
| 35 | a | 342.93 | 0.02627  | YES | YES |
| 36 | a | 350.20 | 2.71382  | YES | YES |
| 37 | a | 355.78 | 4.75174  | YES | YES |
| 38 | a | 394.51 | 0.00408  | YES | YES |
| 39 | a | 419.68 | 4.67116  | YES | YES |

|    |   |        |           |     |     |
|----|---|--------|-----------|-----|-----|
| 40 | a | 429.71 | 24.80334  | YES | YES |
| 41 | a | 445.36 | 1.40650   | YES | YES |
| 42 | a | 447.19 | 354.91879 | YES | YES |
| 43 | a | 452.70 | 9.14072   | YES | YES |
| 44 | a | 456.56 | 11.68007  | YES | YES |
| 45 | a | 460.74 | 19.02963  | YES | YES |
| 46 | a | 467.85 | 0.69045   | YES | YES |
| 47 | a | 494.11 | 12.73168  | YES | YES |
| 48 | a | 500.72 | 0.65254   | YES | YES |
| 49 | a | 500.80 | 1.31686   | YES | YES |
| 50 | a | 512.57 | 11.96128  | YES | YES |
| 51 | a | 529.67 | 12.45523  | YES | YES |
| 52 | a | 536.42 | 0.70298   | YES | YES |
| 53 | a | 548.89 | 23.32055  | YES | YES |
| 54 | a | 566.16 | 7.89388   | YES | YES |
| 55 | a | 573.89 | 3.81932   | YES | YES |
| 56 | a | 580.40 | 6.42569   | YES | YES |
| 57 | a | 582.71 | 1.77724   | YES | YES |
| 58 | a | 598.41 | 2.62657   | YES | YES |
| 59 | a | 598.93 | 31.92649  | YES | YES |
| 60 | a | 638.00 | 16.78876  | YES | YES |
| 61 | a | 652.60 | 22.23623  | YES | YES |
| 62 | a | 667.93 | 0.33185   | YES | YES |
| 63 | a | 677.58 | 17.92628  | YES | YES |
| 64 | a | 704.30 | 8.78744   | YES | YES |
| 65 | a | 757.74 | 5.04914   | YES | YES |

|    |   |        |           |     |     |
|----|---|--------|-----------|-----|-----|
| 66 | a | 758.71 | 1.55198   | YES | YES |
| 67 | a | 765.01 | 155.19670 | YES | YES |
| 68 | a | 766.73 | 3.76089   | YES | YES |
| 69 | a | 776.02 | 22.42534  | YES | YES |
| 70 | a | 778.70 | 0.02111   | YES | YES |
| 71 | a | 780.68 | 0.38128   | YES | YES |
| 72 | a | 806.26 | 1.77201   | YES | YES |
| 73 | a | 813.61 | 24.30207  | YES | YES |
| 74 | a | 839.69 | 49.16121  | YES | YES |
| 75 | a | 843.00 | 53.14046  | YES | YES |
| 76 | a | 854.97 | 188.75910 | YES | YES |
| 77 | a | 855.26 | 155.81005 | YES | YES |
| 78 | a | 868.51 | 8.76539   | YES | YES |
| 79 | a | 869.11 | 0.12708   | YES | YES |
| 80 | a | 883.03 | 0.12541   | YES | YES |
| 81 | a | 883.18 | 7.17008   | YES | YES |
| 82 | a | 892.86 | 3.46781   | YES | YES |
| 83 | a | 898.25 | 49.27866  | YES | YES |
| 84 | a | 914.94 | 1.45212   | YES | YES |
| 85 | a | 927.87 | 5.84150   | YES | YES |
| 86 | a | 940.49 | 0.14769   | YES | YES |
| 87 | a | 953.28 | 1.81747   | YES | YES |
| 88 | a | 955.76 | 3.30128   | YES | YES |
| 89 | a | 964.18 | 1.67846   | YES | YES |
| 90 | a | 965.13 | 15.24275  | YES | YES |
| 91 | a | 967.44 | 3.17653   | YES | YES |

|     |   |         |           |     |     |
|-----|---|---------|-----------|-----|-----|
| 92  | a | 1001.95 | 8.21450   | YES | YES |
| 93  | a | 1002.23 | 3.84823   | YES | YES |
| 94  | a | 1005.29 | 12.79085  | YES | YES |
| 95  | a | 1005.53 | 9.39227   | YES | YES |
| 96  | a | 1006.85 | 0.89553   | YES | YES |
| 97  | a | 1006.87 | 0.47888   | YES | YES |
| 98  | a | 1031.32 | 3.61122   | YES | YES |
| 99  | a | 1054.58 | 22.04236  | YES | YES |
| 100 | a | 1054.65 | 22.83955  | YES | YES |
| 101 | a | 1111.65 | 6.33333   | YES | YES |
| 102 | a | 1111.93 | 2.65043   | YES | YES |
| 103 | a | 1116.57 | 10.08914  | YES | YES |
| 104 | a | 1130.44 | 4.33184   | YES | YES |
| 105 | a | 1146.03 | 31.43167  | YES | YES |
| 106 | a | 1151.60 | 18.09304  | YES | YES |
| 107 | a | 1151.64 | 10.17463  | YES | YES |
| 108 | a | 1153.21 | 14.03924  | YES | YES |
| 109 | a | 1175.58 | 29.53039  | YES | YES |
| 110 | a | 1180.73 | 316.09918 | YES | YES |
| 111 | a | 1181.21 | 33.49737  | YES | YES |
| 112 | a | 1208.05 | 9.28166   | YES | YES |
| 113 | a | 1210.40 | 517.68544 | YES | YES |
| 114 | a | 1252.89 | 31.55410  | YES | YES |
| 115 | a | 1256.10 | 35.48656  | YES | YES |
| 116 | a | 1267.05 | 46.50254  | YES | YES |
| 117 | a | 1267.86 | 146.08112 | YES | YES |

|     |   |         |           |     |     |
|-----|---|---------|-----------|-----|-----|
| 118 | a | 1283.44 | 106.18037 | YES | YES |
| 119 | a | 1286.72 | 225.68105 | YES | YES |
| 120 | a | 1294.79 | 0.83734   | YES | YES |
| 121 | a | 1296.00 | 56.12037  | YES | YES |
| 122 | a | 1324.69 | 146.26589 | YES | YES |
| 123 | a | 1324.98 | 98.56661  | YES | YES |
| 124 | a | 1329.40 | 46.81980  | YES | YES |
| 125 | a | 1329.46 | 55.45496  | YES | YES |
| 126 | a | 1377.33 | 62.10687  | YES | YES |
| 127 | a | 1377.58 | 70.18384  | YES | YES |
| 128 | a | 1383.49 | 74.66078  | YES | YES |
| 129 | a | 1383.59 | 35.48380  | YES | YES |
| 130 | a | 1389.73 | 35.38174  | YES | YES |
| 131 | a | 1398.83 | 49.91690  | YES | YES |
| 132 | a | 1399.15 | 50.73805  | YES | YES |
| 133 | a | 1409.98 | 4.14233   | YES | YES |
| 134 | a | 1452.02 | 1.87511   | YES | YES |
| 135 | a | 1453.20 | 61.11521  | YES | YES |
| 136 | a | 1461.89 | 4.41089   | YES | YES |
| 137 | a | 1468.75 | 4.48568   | YES | YES |
| 138 | a | 1480.44 | 11.37779  | YES | YES |
| 139 | a | 1484.61 | 44.66709  | YES | YES |
| 140 | a | 1501.92 | 13.74685  | YES | YES |
| 141 | a | 1502.05 | 3.02294   | YES | YES |
| 142 | a | 1505.65 | 50.70640  | YES | YES |
| 143 | a | 1505.85 | 57.64019  | YES | YES |

|     |   |         |            |     |     |
|-----|---|---------|------------|-----|-----|
| 144 | a | 1525.65 | 207.52712  | YES | YES |
| 145 | a | 1527.54 | 523.12153  | YES | YES |
| 146 | a | 1530.32 | 137.72861  | YES | YES |
| 147 | a | 1531.38 | 1.20834    | YES | YES |
| 148 | a | 1630.17 | 498.05560  | YES | YES |
| 149 | a | 1631.17 | 76.92303   | YES | YES |
| 150 | a | 1637.53 | 62.09059   | YES | YES |
| 151 | a | 1637.84 | 51.63922   | YES | YES |
| 152 | a | 1659.47 | 76.45271   | YES | YES |
| 153 | a | 1659.76 | 87.46622   | YES | YES |
| 154 | a | 1679.34 | 493.92437  | YES | YES |
| 155 | a | 1680.06 | 75.10622   | YES | YES |
| 156 | a | 1682.52 | 556.26487  | YES | YES |
| 157 | a | 1685.34 | 0.94790    | YES | YES |
| 158 | a | 2941.05 | 1636.73480 | YES | YES |
| 159 | a | 2941.54 | 592.37917  | YES | YES |
| 160 | a | 3010.76 | 28.92811   | YES | YES |
| 161 | a | 3015.82 | 27.23872   | YES | YES |
| 162 | a | 3078.32 | 22.05447   | YES | YES |
| 163 | a | 3078.40 | 22.68668   | YES | YES |
| 164 | a | 3093.50 | 1.36975    | YES | YES |
| 165 | a | 3097.48 | 102.64188  | YES | YES |
| 166 | a | 3101.72 | 17.37191   | YES | YES |
| 167 | a | 3101.90 | 49.25917   | YES | YES |
| 168 | a | 3170.93 | 0.01035    | YES | YES |
| 169 | a | 3170.95 | 0.01045    | YES | YES |



|     |   |         |           |     |     |
|-----|---|---------|-----------|-----|-----|
| 170 | a | 3172.79 | 1.13963   | YES | YES |
| 171 | a | 3172.93 | 13.69214  | YES | YES |
| 172 | a | 3180.32 | 15.78651  | YES | YES |
| 173 | a | 3180.32 | 3.30982   | YES | YES |
| 174 | a | 3188.88 | 3.50436   | YES | YES |
| 175 | a | 3188.88 | 35.76797  | YES | YES |
| 176 | a | 3191.85 | 16.22968  | YES | YES |
| 177 | a | 3191.94 | 22.84055  | YES | YES |
| 178 | a | 3194.69 | 1.36186   | YES | YES |
| 179 | a | 3194.90 | 1.73307   | YES | YES |
| 180 | a | 3195.85 | 33.31144  | YES | YES |
| 181 | a | 3195.86 | 6.24932   | YES | YES |
| 182 | a | 3589.01 | 453.73760 | YES | YES |
| 183 | a | 3589.03 | 9.00493   | YES | YES |

Table S4. Vibrational dataset for Al<sup>3+</sup>-H<sub>4</sub>L.

Vibrational Spectrum:

| mode | symmetry | wave number           | IR intensity |    | selection rules |
|------|----------|-----------------------|--------------|----|-----------------|
|      |          | cm <sup>**</sup> (-1) | km/mol       | IR | Raman           |
| 1    |          | -0.00                 | 0.00000      | -  | -               |
| 2    |          | 0.00                  | 0.00000      | -  | -               |
| 3    |          | 0.00                  | 0.00000      | -  | -               |
| 4    |          | 0.00                  | 0.00000      | -  | -               |
| 5    |          | 0.00                  | 0.00000      | -  | -               |
| 6    |          | 0.00                  | 0.00000      | -  | -               |
| 7    |          | 0.03                  | 0.05802      | -  | -               |

|    |   |        |          |     |     |
|----|---|--------|----------|-----|-----|
| 8  | a | 5.80   | 0.06112  | YES | YES |
| 9  | a | 7.00   | 0.17906  | YES | YES |
| 10 | a | 19.25  | 2.12908  | YES | YES |
| 11 | a | 34.70  | 0.00009  | YES | YES |
| 12 | a | 43.20  | 0.09528  | YES | YES |
| 13 | a | 45.42  | 0.53554  | YES | YES |
| 14 | a | 58.71  | 0.25022  | YES | YES |
| 15 | a | 63.21  | 4.52846  | YES | YES |
| 16 | a | 68.92  | 2.60506  | YES | YES |
| 17 | a | 78.84  | 0.00237  | YES | YES |
| 18 | a | 83.96  | 0.00123  | YES | YES |
| 19 | a | 100.24 | 0.61990  | YES | YES |
| 20 | a | 106.86 | 0.04662  | YES | YES |
| 21 | a | 122.50 | 0.01281  | YES | YES |
| 22 | a | 125.80 | 0.33435  | YES | YES |
| 23 | a | 135.36 | 0.08975  | YES | YES |
| 24 | a | 154.27 | 0.56011  | YES | YES |
| 25 | a | 154.84 | 0.30392  | YES | YES |
| 26 | a | 175.97 | 0.18706  | YES | YES |
| 27 | a | 187.40 | 4.37310  | YES | YES |
| 28 | a | 198.14 | 16.02725 | YES | YES |
| 29 | a | 198.28 | 6.89253  | YES | YES |
| 30 | a | 221.53 | 3.45560  | YES | YES |
| 31 | a | 223.76 | 2.40122  | YES | YES |
| 32 | a | 238.37 | 8.21797  | YES | YES |
| 33 | a | 238.64 | 2.12369  | YES | YES |

|    |   |        |           |     |     |
|----|---|--------|-----------|-----|-----|
| 34 | a | 246.93 | 0.20038   | YES | YES |
| 35 | a | 261.80 | 16.58777  | YES | YES |
| 36 | a | 264.01 | 10.01685  | YES | YES |
| 37 | a | 274.13 | 4.66977   | YES | YES |
| 38 | a | 289.94 | 0.68112   | YES | YES |
| 39 | a | 293.11 | 0.31310   | YES | YES |
| 40 | a | 312.79 | 0.31808   | YES | YES |
| 41 | a | 320.77 | 18.09122  | YES | YES |
| 42 | a | 326.69 | 0.23205   | YES | YES |
| 43 | a | 336.78 | 7.93604   | YES | YES |
| 44 | a | 345.94 | 0.33833   | YES | YES |
| 45 | a | 349.22 | 2.99260   | YES | YES |
| 46 | a | 358.02 | 8.71079   | YES | YES |
| 47 | a | 368.47 | 0.00187   | YES | YES |
| 48 | a | 381.39 | 25.08761  | YES | YES |
| 49 | a | 385.46 | 6.49710   | YES | YES |
| 50 | a | 390.98 | 2.80687   | YES | YES |
| 51 | a | 398.06 | 53.12676  | YES | YES |
| 52 | a | 398.34 | 11.79348  | YES | YES |
| 53 | a | 442.64 | 0.44194   | YES | YES |
| 54 | a | 444.50 | 28.66836  | YES | YES |
| 55 | a | 458.70 | 4.11608   | YES | YES |
| 56 | a | 464.00 | 10.99610  | YES | YES |
| 57 | a | 485.66 | 13.86484  | YES | YES |
| 58 | a | 488.40 | 624.49546 | YES | YES |
| 59 | a | 494.05 | 8.70009   | YES | YES |

|    |   |        |           |     |     |
|----|---|--------|-----------|-----|-----|
| 60 | a | 505.72 | 73.55931  | YES | YES |
| 61 | a | 506.05 | 2.14816   | YES | YES |
| 62 | a | 518.23 | 9.62103   | YES | YES |
| 63 | a | 528.78 | 28.26472  | YES | YES |
| 64 | a | 562.65 | 13.03545  | YES | YES |
| 65 | a | 571.56 | 19.54597  | YES | YES |
| 66 | a | 573.85 | 0.64394   | YES | YES |
| 67 | a | 577.77 | 52.57769  | YES | YES |
| 68 | a | 579.03 | 2.99612   | YES | YES |
| 69 | a | 583.25 | 118.59346 | YES | YES |
| 70 | a | 595.65 | 44.04377  | YES | YES |
| 71 | a | 617.54 | 76.88206  | YES | YES |
| 72 | a | 641.75 | 47.63403  | YES | YES |
| 73 | a | 653.61 | 0.37294   | YES | YES |
| 74 | a | 660.42 | 96.21353  | YES | YES |
| 75 | a | 667.33 | 14.51684  | YES | YES |
| 76 | a | 689.16 | 16.96804  | YES | YES |
| 77 | a | 690.48 | 13.30839  | YES | YES |
| 78 | a | 711.10 | 0.68399   | YES | YES |
| 79 | a | 711.66 | 0.60854   | YES | YES |
| 80 | a | 720.28 | 49.82801  | YES | YES |
| 81 | a | 755.76 | 122.62530 | YES | YES |
| 82 | a | 756.16 | 5.62645   | YES | YES |
| 83 | a | 766.16 | 114.75111 | YES | YES |
| 84 | a | 766.24 | 97.51798  | YES | YES |
| 85 | a | 772.98 | 4.16187   | YES | YES |

|     |   |        |           |     |     |
|-----|---|--------|-----------|-----|-----|
| 86  | a | 774.91 | 1.43985   | YES | YES |
| 87  | a | 781.93 | 1.39856   | YES | YES |
| 88  | a | 787.27 | 24.84187  | YES | YES |
| 89  | a | 787.63 | 2.54077   | YES | YES |
| 90  | a | 809.82 | 2.21049   | YES | YES |
| 91  | a | 809.95 | 76.28102  | YES | YES |
| 92  | a | 824.41 | 63.79743  | YES | YES |
| 93  | a | 824.44 | 93.99176  | YES | YES |
| 94  | a | 860.84 | 35.83157  | YES | YES |
| 95  | a | 864.91 | 82.13873  | YES | YES |
| 96  | a | 869.44 | 186.21915 | YES | YES |
| 97  | a | 871.10 | 57.83276  | YES | YES |
| 98  | a | 872.74 | 5.60357   | YES | YES |
| 99  | a | 881.20 | 303.18459 | YES | YES |
| 100 | a | 888.52 | 3.03203   | YES | YES |
| 101 | a | 888.58 | 19.18503  | YES | YES |
| 102 | a | 908.70 | 16.43371  | YES | YES |
| 103 | a | 913.84 | 1.00906   | YES | YES |
| 104 | a | 919.58 | 1.03234   | YES | YES |
| 105 | a | 927.20 | 4.38326   | YES | YES |
| 106 | a | 945.39 | 5.03652   | YES | YES |
| 107 | a | 956.20 | 3.52242   | YES | YES |
| 108 | a | 961.85 | 15.23310  | YES | YES |
| 109 | a | 964.88 | 3.52405   | YES | YES |
| 110 | a | 965.11 | 4.49015   | YES | YES |
| 111 | a | 971.34 | 5.98698   | YES | YES |

|     |   |         |           |     |     |
|-----|---|---------|-----------|-----|-----|
| 112 | a | 999.58  | 84.71771  | YES | YES |
| 113 | a | 1000.14 | 4.38505   | YES | YES |
| 114 | a | 1010.48 | 0.22621   | YES | YES |
| 115 | a | 1010.51 | 0.22394   | YES | YES |
| 116 | a | 1011.88 | 0.96611   | YES | YES |
| 117 | a | 1012.15 | 2.17160   | YES | YES |
| 118 | a | 1031.51 | 2.77527   | YES | YES |
| 119 | a | 1047.01 | 26.01494  | YES | YES |
| 120 | a | 1047.05 | 15.54091  | YES | YES |
| 121 | a | 1057.48 | 118.62560 | YES | YES |
| 122 | a | 1057.92 | 127.95934 | YES | YES |
| 123 | a | 1117.94 | 24.97361  | YES | YES |
| 124 | a | 1119.85 | 25.10261  | YES | YES |
| 125 | a | 1120.25 | 7.74388   | YES | YES |
| 126 | a | 1133.20 | 3.78785   | YES | YES |
| 127 | a | 1150.14 | 44.75774  | YES | YES |
| 128 | a | 1150.64 | 14.20800  | YES | YES |
| 129 | a | 1153.28 | 21.11991  | YES | YES |
| 130 | a | 1159.40 | 43.73551  | YES | YES |
| 131 | a | 1177.44 | 21.72009  | YES | YES |
| 132 | a | 1205.62 | 156.80413 | YES | YES |
| 133 | a | 1206.52 | 2.74046   | YES | YES |
| 134 | a | 1236.39 | 3.20149   | YES | YES |
| 135 | a | 1243.98 | 336.24534 | YES | YES |
| 136 | a | 1272.27 | 78.76045  | YES | YES |
| 137 | a | 1278.33 | 87.54134  | YES | YES |

|     |   |         |           |     |     |
|-----|---|---------|-----------|-----|-----|
| 138 | a | 1281.28 | 21.71182  | YES | YES |
| 139 | a | 1281.79 | 78.92220  | YES | YES |
| 140 | a | 1287.80 | 701.48266 | YES | YES |
| 141 | a | 1288.04 | 420.87308 | YES | YES |
| 142 | a | 1292.61 | 7.28343   | YES | YES |
| 143 | a | 1293.00 | 50.35293  | YES | YES |
| 144 | a | 1315.38 | 161.25485 | YES | YES |
| 145 | a | 1315.85 | 122.62747 | YES | YES |
| 146 | a | 1334.84 | 229.38895 | YES | YES |
| 147 | a | 1335.60 | 326.48414 | YES | YES |
| 148 | a | 1357.76 | 295.40977 | YES | YES |
| 149 | a | 1357.86 | 1.70949   | YES | YES |
| 150 | a | 1389.70 | 69.03168  | YES | YES |
| 151 | a | 1391.91 | 72.91544  | YES | YES |
| 152 | a | 1394.45 | 20.34725  | YES | YES |
| 153 | a | 1411.28 | 18.69076  | YES | YES |
| 154 | a | 1414.60 | 134.04386 | YES | YES |
| 155 | a | 1416.08 | 184.41861 | YES | YES |
| 156 | a | 1459.10 | 7.07845   | YES | YES |
| 157 | a | 1462.21 | 2.25820   | YES | YES |
| 158 | a | 1464.27 | 0.22460   | YES | YES |
| 159 | a | 1468.39 | 0.71417   | YES | YES |
| 160 | a | 1480.24 | 17.53717  | YES | YES |
| 161 | a | 1486.52 | 12.67062  | YES | YES |
| 162 | a | 1501.91 | 5.58146   | YES | YES |
| 163 | a | 1501.95 | 22.22900  | YES | YES |

|     |   |         |           |     |     |
|-----|---|---------|-----------|-----|-----|
| 164 | a | 1513.38 | 361.05944 | YES | YES |
| 165 | a | 1513.43 | 396.02199 | YES | YES |
| 166 | a | 1514.02 | 32.87090  | YES | YES |
| 167 | a | 1515.67 | 262.79127 | YES | YES |
| 168 | a | 1587.19 | 925.55582 | YES | YES |
| 169 | a | 1590.46 | 5.58141   | YES | YES |
| 170 | a | 1626.18 | 3.98498   | YES | YES |
| 171 | a | 1626.28 | 6.81839   | YES | YES |
| 172 | a | 1649.38 | 96.39403  | YES | YES |
| 173 | a | 1649.62 | 234.90007 | YES | YES |
| 174 | a | 1667.91 | 691.69579 | YES | YES |
| 175 | a | 1669.41 | 29.86391  | YES | YES |
| 176 | a | 1673.58 | 955.80744 | YES | YES |
| 177 | a | 1676.91 | 68.04688  | YES | YES |
| 178 | a | 1719.67 | 744.61313 | YES | YES |
| 179 | a | 1720.19 | 798.76677 | YES | YES |
| 180 | a | 3010.96 | 28.43563  | YES | YES |
| 181 | a | 3016.01 | 24.11913  | YES | YES |
| 182 | a | 3093.82 | 1.21333   | YES | YES |
| 183 | a | 3097.77 | 99.65875  | YES | YES |
| 184 | a | 3101.77 | 16.37169  | YES | YES |
| 185 | a | 3101.91 | 46.67576  | YES | YES |
| 186 | a | 3139.62 | 14.13935  | YES | YES |
| 187 | a | 3139.65 | 11.97693  | YES | YES |
| 188 | a | 3172.05 | 0.92392   | YES | YES |
| 189 | a | 3172.10 | 0.92619   | YES | YES |



|     |   |         |          |     |     |
|-----|---|---------|----------|-----|-----|
| 190 | a | 3176.00 | 3.35641  | YES | YES |
| 191 | a | 3176.18 | 12.73563 | YES | YES |
| 192 | a | 3181.54 | 8.62948  | YES | YES |
| 193 | a | 3181.55 | 7.26598  | YES | YES |
| 194 | a | 3190.84 | 19.96411 | YES | YES |
| 195 | a | 3190.86 | 19.91450 | YES | YES |
| 196 | a | 3194.94 | 11.74756 | YES | YES |
| 197 | a | 3195.00 | 20.07716 | YES | YES |
| 198 | a | 3197.13 | 39.37347 | YES | YES |
| 199 | a | 3197.14 | 7.46511  | YES | YES |
| 200 | a | 3201.16 | 1.53516  | YES | YES |
| 201 | a | 3201.31 | 3.45581  | YES | YES |

Table S5. NBO population of **H<sub>4</sub>L**.

atomic populations from total density:

| atom | charge   | n(s)    | n(p)    | n(d)    | n(f)    | n(g)    |
|------|----------|---------|---------|---------|---------|---------|
| 1 o  | -0.71702 | 3.63847 | 5.07297 | 0.00558 | 0.00000 | 0.00000 |
| 2 c  | -0.08191 | 2.85972 | 3.21762 | 0.00457 | 0.00000 | 0.00000 |
| 3 c  | -0.60431 | 3.07131 | 3.52933 | 0.00367 | 0.00000 | 0.00000 |
| 4 c  | -0.60426 | 3.07136 | 3.52924 | 0.00367 | 0.00000 | 0.00000 |
| 5 c  | -0.07005 | 2.84395 | 3.22247 | 0.00363 | 0.00000 | 0.00000 |
| 6 c  | -0.16872 | 2.93066 | 3.23431 | 0.00376 | 0.00000 | 0.00000 |
| 7 c  | -0.27159 | 2.94196 | 3.32609 | 0.00353 | 0.00000 | 0.00000 |
| 8 c  | 0.39039  | 2.79930 | 2.80271 | 0.00759 | 0.00000 | 0.00000 |
| 9 c  | -0.19216 | 2.86211 | 3.32669 | 0.00336 | 0.00000 | 0.00000 |

|      |          |         |         |         |         |         |
|------|----------|---------|---------|---------|---------|---------|
| 10 c | -0.16684 | 2.91332 | 3.24987 | 0.00365 | 0.00000 | 0.00000 |
| 11 c | 0.18396  | 2.89942 | 2.91076 | 0.00587 | 0.00000 | 0.00000 |
| 12 c | -0.07019 | 2.84391 | 3.22265 | 0.00363 | 0.00000 | 0.00000 |
| 13 c | -0.16864 | 2.93065 | 3.23423 | 0.00376 | 0.00000 | 0.00000 |
| 14 c | -0.27155 | 2.94200 | 3.32602 | 0.00353 | 0.00000 | 0.00000 |
| 15 c | 0.39046  | 2.79931 | 2.80265 | 0.00759 | 0.00000 | 0.00000 |
| 16 c | -0.19217 | 2.86209 | 3.32672 | 0.00336 | 0.00000 | 0.00000 |
| 17 c | -0.16688 | 2.91328 | 3.24996 | 0.00365 | 0.00000 | 0.00000 |
| 18 c | 0.18390  | 2.89941 | 2.91082 | 0.00587 | 0.00000 | 0.00000 |
| 19 h | 0.49812  | 0.50175 | 0.00013 | 0.00000 | 0.00000 | 0.00000 |
| 20 h | 0.22354  | 0.77642 | 0.00004 | 0.00000 | 0.00000 | 0.00000 |
| 21 h | 0.21728  | 0.78268 | 0.00004 | 0.00000 | 0.00000 | 0.00000 |
| 22 h | 0.21777  | 0.78220 | 0.00004 | 0.00000 | 0.00000 | 0.00000 |
| 23 h | 0.21773  | 0.78223 | 0.00004 | 0.00000 | 0.00000 | 0.00000 |
| 24 h | 0.22354  | 0.77642 | 0.00004 | 0.00000 | 0.00000 | 0.00000 |
| 25 h | 0.21730  | 0.78266 | 0.00004 | 0.00000 | 0.00000 | 0.00000 |
| 26 h | 0.23338  | 0.76658 | 0.00004 | 0.00000 | 0.00000 | 0.00000 |
| 27 h | 0.23837  | 0.76159 | 0.00004 | 0.00000 | 0.00000 | 0.00000 |
| 28 h | 0.23245  | 0.76751 | 0.00004 | 0.00000 | 0.00000 | 0.00000 |
| 29 h | 0.20099  | 0.79897 | 0.00004 | 0.00000 | 0.00000 | 0.00000 |
| 30 h | 0.23334  | 0.76662 | 0.00004 | 0.00000 | 0.00000 | 0.00000 |
| 31 h | 0.23842  | 0.76154 | 0.00004 | 0.00000 | 0.00000 | 0.00000 |
| 32 h | 0.23241  | 0.76755 | 0.00004 | 0.00000 | 0.00000 | 0.00000 |
| 33 h | 0.20097  | 0.79899 | 0.00004 | 0.00000 | 0.00000 | 0.00000 |
| 34 o | -0.69125 | 3.64262 | 5.04308 | 0.00555 | 0.00000 | 0.00000 |
| 35 n | -0.59778 | 3.32056 | 4.27226 | 0.00497 | 0.00000 | 0.00000 |

|      |          |         |         |         |         |         |
|------|----------|---------|---------|---------|---------|---------|
| 36 c | 0.34749  | 2.80394 | 2.84120 | 0.00737 | 0.00000 | 0.00000 |
| 37 c | 0.08384  | 2.81685 | 3.09429 | 0.00503 | 0.00000 | 0.00000 |
| 38 c | -0.22863 | 2.94022 | 3.28476 | 0.00365 | 0.00000 | 0.00000 |
| 39 c | -0.24808 | 2.94162 | 3.30281 | 0.00365 | 0.00000 | 0.00000 |
| 40 c | -0.21011 | 2.94624 | 3.26010 | 0.00377 | 0.00000 | 0.00000 |
| 41 c | -0.27986 | 2.94625 | 3.33002 | 0.00358 | 0.00000 | 0.00000 |
| 42 h | 0.23420  | 0.76576 | 0.00004 | 0.00000 | 0.00000 | 0.00000 |
| 43 h | 0.23053  | 0.76943 | 0.00004 | 0.00000 | 0.00000 | 0.00000 |
| 44 h | 0.23103  | 0.76893 | 0.00004 | 0.00000 | 0.00000 | 0.00000 |
| 45 h | 0.23689  | 0.76307 | 0.00004 | 0.00000 | 0.00000 | 0.00000 |
| 46 h | 0.48709  | 0.51279 | 0.00012 | 0.00000 | 0.00000 | 0.00000 |
| 47 o | -0.71687 | 3.63845 | 5.07284 | 0.00558 | 0.00000 | 0.00000 |
| 48 h | 0.49810  | 0.50177 | 0.00013 | 0.00000 | 0.00000 | 0.00000 |
| 49 o | -0.69127 | 3.64262 | 5.04310 | 0.00555 | 0.00000 | 0.00000 |
| 50 n | -0.59771 | 3.32055 | 4.27219 | 0.00497 | 0.00000 | 0.00000 |
| 51 c | 0.34746  | 2.80395 | 2.84121 | 0.00737 | 0.00000 | 0.00000 |
| 52 c | 0.08387  | 2.81684 | 3.09426 | 0.00503 | 0.00000 | 0.00000 |
| 53 c | -0.22865 | 2.94022 | 3.28478 | 0.00365 | 0.00000 | 0.00000 |
| 54 c | -0.24809 | 2.94162 | 3.30281 | 0.00365 | 0.00000 | 0.00000 |
| 55 c | -0.21012 | 2.94624 | 3.26011 | 0.00377 | 0.00000 | 0.00000 |
| 56 c | -0.27987 | 2.94626 | 3.33003 | 0.00358 | 0.00000 | 0.00000 |
| 57 h | 0.23420  | 0.76576 | 0.00004 | 0.00000 | 0.00000 | 0.00000 |
| 58 h | 0.23053  | 0.76943 | 0.00004 | 0.00000 | 0.00000 | 0.00000 |
| 59 h | 0.23103  | 0.76893 | 0.00004 | 0.00000 | 0.00000 | 0.00000 |
| 60 h | 0.23689  | 0.76307 | 0.00004 | 0.00000 | 0.00000 | 0.00000 |
| 61 h | 0.48708  | 0.51280 | 0.00012 | 0.00000 | 0.00000 | 0.00000 |

Table S6. NBO population of Al<sup>3+</sup>-**H<sub>4</sub>L**.

atomic populations from total density:

| atom | charge   | n(s)    | n(p)    | n(d)    | n(f)    | n(g)    |
|------|----------|---------|---------|---------|---------|---------|
| 1 o  | -0.86753 | 3.63699 | 5.22695 | 0.00358 | 0.00000 | 0.00000 |
| 2 c  | -0.08271 | 2.85968 | 3.21846 | 0.00457 | 0.00000 | 0.00000 |
| 3 c  | -0.60550 | 3.07141 | 3.53043 | 0.00366 | 0.00000 | 0.00000 |
| 4 c  | -0.60541 | 3.07147 | 3.53028 | 0.00366 | 0.00000 | 0.00000 |
| 5 c  | -0.06593 | 2.84453 | 3.21774 | 0.00366 | 0.00000 | 0.00000 |
| 6 c  | -0.15792 | 2.93279 | 3.22136 | 0.00378 | 0.00000 | 0.00000 |
| 7 c  | -0.26162 | 2.94566 | 3.31238 | 0.00358 | 0.00000 | 0.00000 |
| 8 c  | 0.41568  | 2.79124 | 2.78574 | 0.00735 | 0.00000 | 0.00000 |
| 9 c  | -0.18980 | 2.86415 | 3.32229 | 0.00336 | 0.00000 | 0.00000 |
| 10 c | -0.15844 | 2.91461 | 3.24016 | 0.00367 | 0.00000 | 0.00000 |
| 11 c | 0.22515  | 2.89408 | 2.87534 | 0.00543 | 0.00000 | 0.00000 |
| 12 c | -0.06613 | 2.84446 | 3.21802 | 0.00366 | 0.00000 | 0.00000 |
| 13 c | -0.15780 | 2.93276 | 3.22126 | 0.00378 | 0.00000 | 0.00000 |
| 14 c | -0.26158 | 2.94569 | 3.31230 | 0.00358 | 0.00000 | 0.00000 |
| 15 c | 0.41548  | 2.79132 | 2.78585 | 0.00735 | 0.00000 | 0.00000 |
| 16 c | -0.18985 | 2.86411 | 3.32237 | 0.00336 | 0.00000 | 0.00000 |
| 17 c | -0.15860 | 2.91451 | 3.24043 | 0.00367 | 0.00000 | 0.00000 |
| 18 c | 0.22506  | 2.89410 | 2.87542 | 0.00543 | 0.00000 | 0.00000 |
| 19 o | -0.88298 | 3.65867 | 5.21994 | 0.00437 | 0.00000 | 0.00000 |
| 20 n | -0.67991 | 3.29483 | 4.38160 | 0.00348 | 0.00000 | 0.00000 |
| 21 c | 0.35445  | 2.79705 | 2.84123 | 0.00727 | 0.00000 | 0.00000 |
| 22 c | 0.08600  | 2.81645 | 3.09294 | 0.00460 | 0.00000 | 0.00000 |

|      |          |         |         |         |         |         |
|------|----------|---------|---------|---------|---------|---------|
| 23 c | -0.22206 | 2.93710 | 3.28128 | 0.00367 | 0.00000 | 0.00000 |
| 24 c | -0.24511 | 2.94256 | 3.29890 | 0.00364 | 0.00000 | 0.00000 |
| 25 c | -0.20297 | 2.94793 | 3.25126 | 0.00378 | 0.00000 | 0.00000 |
| 26 c | -0.27549 | 2.94757 | 3.32431 | 0.00361 | 0.00000 | 0.00000 |
| 27 o | -0.86741 | 3.63720 | 5.22663 | 0.00358 | 0.00000 | 0.00000 |
| 28 o | -0.88298 | 3.65865 | 5.21996 | 0.00438 | 0.00000 | 0.00000 |
| 29 n | -0.67989 | 3.29468 | 4.38173 | 0.00348 | 0.00000 | 0.00000 |
| 30 c | 0.35442  | 2.79709 | 2.84123 | 0.00727 | 0.00000 | 0.00000 |
| 31 c | 0.08595  | 2.81644 | 3.09302 | 0.00460 | 0.00000 | 0.00000 |
| 32 c | -0.22192 | 2.93709 | 3.28115 | 0.00367 | 0.00000 | 0.00000 |
| 33 c | -0.24510 | 2.94257 | 3.29889 | 0.00364 | 0.00000 | 0.00000 |
| 34 c | -0.20290 | 2.94794 | 3.25118 | 0.00378 | 0.00000 | 0.00000 |
| 35 c | -0.27545 | 2.94756 | 3.32429 | 0.00361 | 0.00000 | 0.00000 |
| 36 h | 0.22533  | 0.77463 | 0.00004 | 0.00000 | 0.00000 | 0.00000 |
| 37 h | 0.21915  | 0.78081 | 0.00004 | 0.00000 | 0.00000 | 0.00000 |
| 38 h | 0.21878  | 0.78118 | 0.00004 | 0.00000 | 0.00000 | 0.00000 |
| 39 h | 0.21875  | 0.78121 | 0.00004 | 0.00000 | 0.00000 | 0.00000 |
| 40 h | 0.22532  | 0.77464 | 0.00004 | 0.00000 | 0.00000 | 0.00000 |
| 41 h | 0.21916  | 0.78080 | 0.00004 | 0.00000 | 0.00000 | 0.00000 |
| 42 h | 0.23583  | 0.76413 | 0.00004 | 0.00000 | 0.00000 | 0.00000 |
| 43 h | 0.24035  | 0.75961 | 0.00004 | 0.00000 | 0.00000 | 0.00000 |
| 44 h | 0.23543  | 0.76453 | 0.00004 | 0.00000 | 0.00000 | 0.00000 |
| 45 h | 0.21891  | 0.78105 | 0.00004 | 0.00000 | 0.00000 | 0.00000 |
| 46 h | 0.23579  | 0.76417 | 0.00004 | 0.00000 | 0.00000 | 0.00000 |
| 47 h | 0.24035  | 0.75961 | 0.00004 | 0.00000 | 0.00000 | 0.00000 |
| 48 h | 0.23541  | 0.76455 | 0.00004 | 0.00000 | 0.00000 | 0.00000 |

|       |          |         |         |         |         |         |
|-------|----------|---------|---------|---------|---------|---------|
| 49 h  | 0.21897  | 0.78100 | 0.00004 | 0.00000 | 0.00000 | 0.00000 |
| 50 h  | 0.23650  | 0.76346 | 0.00004 | 0.00000 | 0.00000 | 0.00000 |
| 51 h  | 0.23199  | 0.76797 | 0.00004 | 0.00000 | 0.00000 | 0.00000 |
| 52 h  | 0.23211  | 0.76785 | 0.00004 | 0.00000 | 0.00000 | 0.00000 |
| 53 h  | 0.23685  | 0.76311 | 0.00004 | 0.00000 | 0.00000 | 0.00000 |
| 54 h  | 0.23648  | 0.76348 | 0.00004 | 0.00000 | 0.00000 | 0.00000 |
| 55 h  | 0.23201  | 0.76795 | 0.00004 | 0.00000 | 0.00000 | 0.00000 |
| 56 h  | 0.23212  | 0.76784 | 0.00004 | 0.00000 | 0.00000 | 0.00000 |
| 57 h  | 0.23686  | 0.76310 | 0.00004 | 0.00000 | 0.00000 | 0.00000 |
| 58 n  | 0.78535  | 2.98334 | 3.20971 | 0.02160 | 0.00000 | 0.00000 |
| 59 o  | -0.53085 | 3.73502 | 4.78929 | 0.00653 | 0.00000 | 0.00000 |
| 60 o  | -0.58206 | 3.73979 | 4.83595 | 0.00633 | 0.00000 | 0.00000 |
| 61 o  | -0.31540 | 3.71882 | 4.58823 | 0.00835 | 0.00000 | 0.00000 |
| 62 n  | 0.78538  | 2.98331 | 3.20971 | 0.02160 | 0.00000 | 0.00000 |
| 63 o  | -0.53112 | 3.73498 | 4.78961 | 0.00653 | 0.00000 | 0.00000 |
| 64 o  | -0.58172 | 3.73975 | 4.83564 | 0.00633 | 0.00000 | 0.00000 |
| 65 o  | -0.31562 | 3.71890 | 4.58838 | 0.00835 | 0.00000 | 0.00000 |
| 66 al | 1.88726  | 4.38003 | 6.69370 | 0.03431 | 0.00470 | 0.00000 |
| 67 al | 1.88715  | 4.37995 | 6.69391 | 0.03430 | 0.00469 | 0.00000 |
